# Supplementary material
Source: HighWire-hosted journal article supplement (https://bmjopen.bmj.com/content/7/5/e016045)
Supplement: inline-supplementary-material-1 [file inline-supplementary-material-1.pdf]

## Appendix 1: Supplementary tables 1-4 [posted as supplied by the authors]

**Supplementary table 1.** Derivation of the Adverse Childhood Experiences (ACE) score from information obtained via medical records abstraction

| Score item*                                                                                                                                                                                                                                             | Medical record data (examples of text)                                                                                                                                                                                                                                                                                                                                                                                                                                                                                                                                                                                              |
|---------------------------------------------------------------------------------------------------------------------------------------------------------------------------------------------------------------------------------------------------------|-------------------------------------------------------------------------------------------------------------------------------------------------------------------------------------------------------------------------------------------------------------------------------------------------------------------------------------------------------------------------------------------------------------------------------------------------------------------------------------------------------------------------------------------------------------------------------------------------------------------------------------|
| Q1: Did a parent or another adult in the household <i>often or very often</i> ...swear at you, insult you, put you down, or humiliate you? Or act in a way that made you afraid that you might be physically hurt?                                      | <ul style="list-style-type: none"> <li>When he/she came home drunk, he/she used to swear at all of us. I dreaded seeing him/her.</li> <li>Was very distant but had outbursts of anger when he/she thought things were not done his/her way.</li> <li>Very mean to us for no reason, my siblings and I did not know what was in his/her mind.</li> <li>Patient stated she was emotionally abused.</li> </ul>                                                                                                                                                                                                                         |
| Q2: Did a parent or another adult in the household <i>often or very often</i> ...push, grab, slap, or throw something at you? Or ever hit you so hard that you had marks or were injured?                                                               | <ul style="list-style-type: none"> <li>Several times a week we had a brawl. I was so scared but I had no way to avoid it.</li> <li>He/she would hit me with a belt for stupid reason or throw me against the wall; I had to go to the emergency room.</li> <li>Patient stated she was physically abused.</li> </ul>                                                                                                                                                                                                                                                                                                                 |
| Q3: Did an adult or person at least five years older than you <i>ever</i> ...touch or fondle you or have you touch their body in a sexual way? Or attempt to touch you or touch you inappropriately or sexually abuse you?                              | <ul style="list-style-type: none"> <li>I was drugged and intoxicated, I would wake up naked with pain in my vagina or anus.</li> <li>I was very young and he would fondle me (older brother, father, stepfather, boyfriend of my mother).</li> <li>I did not know what to do even though it happened for years, many times a week.</li> <li>He would come to my room many times a week and do what he wanted to me.</li> <li>Patient mentioned sexual abuse or rape but did not give further details.</li> </ul>                                                                                                                    |
| Q4: Did you <i>often or very often</i> feel that...no one in your family loved you or thought you were important or special? Or feel that your family members didn't look out for one another, feel close to one another, or support one another?       | <ul style="list-style-type: none"> <li>My father had 2 jobs to maintain his drug or alcohol abuse, or the substance abuse of my mother, or of both. They were never here for us children.</li> <li>My parents were absent most of the time. I had to go to my grandmother's home.</li> <li>He/she always put my sibling before me.</li> <li>My mother was always commenting of me being flawed (obese or not good looking).</li> <li>I never felt loved or attached. They were too aloof.</li> <li>I could never express my feelings they were so "buttoned up".</li> </ul>                                                         |
| Q5: Did you <i>often or very often</i> feel that...you didn't have enough to eat, had to wear dirty clothes, and had no one to protect you? Or that your parents were too drunk or high to take care of you or take you to the doctor if you needed it? | <ul style="list-style-type: none"> <li>Most of the time when I was sick, my parents were not there or were too self-centered. I would go to the doctor with a friend and then I was reprimanded for that.</li> <li>As a child I would count every penny for food, clothes, and shoes, for my siblings and myself.</li> <li>Father/mother were physically disabled/abusing alcohol or drugs; my siblings and I were dirty and poor, and left to ourselves.</li> <li>Father and mother came from a very impoverished background but we were never able to get out of that and seeing us suffer did not make things better.</li> </ul> |
| Q6: Was a biological parent <i>ever</i> lost to you through divorce, abandonment, or another reason?                                                                                                                                                    | <ul style="list-style-type: none"> <li>Father died in car accident, and we had many years of a very difficult time to get by.</li> <li>My father/mother left us and never showed up again. It was difficult to get by without explanations.</li> <li>My parents divorced, and the situation after that was very complex.</li> <li>My parents divorced and my mother had a new boyfriend not very attentive to us; we felt we were a nuisance.</li> <li>My father died suddenly of liver disease, and we found out he was a closet alcoholic....such a bad time.</li> </ul>                                                          |

**Supplementary table 1.** Derivation of the Adverse Childhood Experiences (ACE) score from information obtained via medical records abstraction (continued)

| Score item*                                                                                                                                                                                                                                                                                                                                | Medical record data                                                                                                                                                                                                                                                                                                                                                                   |
|--------------------------------------------------------------------------------------------------------------------------------------------------------------------------------------------------------------------------------------------------------------------------------------------------------------------------------------------|---------------------------------------------------------------------------------------------------------------------------------------------------------------------------------------------------------------------------------------------------------------------------------------------------------------------------------------------------------------------------------------|
| Q7: Was your mother or stepmother <i>often or very often</i> pushed, grabbed, slapped, or have something thrown at her? Or was she <i>sometimes, often, or very often</i> kicked, bitten, hit with a fist, or hit with something hard? Or ever repeatedly hit over the course of at least a few minutes or threatened with a gun or knife? | <ul style="list-style-type: none"> <li>• Father used to come home drunk and hit my mother.</li> <li>• He lost his temper very quickly and hit my mother for no reason. He scared us to death, and still now I can't forgive him.</li> <li>• One night he hit my mother then left. A few days later I learned that he was engaged and planned to marry his young secretary.</li> </ul> |
| Q8: Did you live with anyone who was a problem drinker or alcoholic, or who used street drugs?                                                                                                                                                                                                                                             | <ul style="list-style-type: none"> <li>• Alcoholic all his/her life.</li> <li>• Closet alcoholic. Died young of liver disease.</li> <li>• Patient stated that a family member was an alcoholic (no additional detail) or a drug user (no additional details).</li> </ul>                                                                                                              |
| Q9: Was a household member depressed or mentally ill, or did a household member attempt suicide?                                                                                                                                                                                                                                           | <ul style="list-style-type: none"> <li>• Severe depression or persistent depressive disorder with or without delusional features.</li> <li>• Bipolar disorder or exacerbation of it.</li> <li>• Depression and anxiety with nervous breakdown that required hospitalization.</li> <li>• Suicide attempt and hospitalizations.</li> <li>• Schizophrenia.</li> </ul>                    |
| Q10: Did a household member go to prison?                                                                                                                                                                                                                                                                                                  | <ul style="list-style-type: none"> <li>• Reported in the medical records.</li> </ul>                                                                                                                                                                                                                                                                                                  |

\* The wording of the questions is the original from Nakazawa's book.<sup>26</sup>

**Supplementary table 2.** Characteristics of cases and controls for each adverse childhood experience

| Characteristic of adverse experience | Bilateral oophorectomy<br>(cases; N = 128) |      | Women without<br>oophorectomy<br>(controls; N = 128) |      | p Value* |
|--------------------------------------|--------------------------------------------|------|------------------------------------------------------|------|----------|
|                                      | N                                          | %    | N                                                    | %    |          |
| <b>Q1: verbal or emotional abuse</b> | 47                                         | 36.7 | 27                                                   | 21.1 | 0.006    |
| Multiple instances of abuse          | 43                                         | 33.6 | 27                                                   | 21.1 | 0.02     |
| Earliest age of onset†               |                                            |      |                                                      |      | 0.01     |
| No experience                        | 81                                         | 63.3 | 101                                                  | 78.9 |          |
| Birth through age 12 years           | 26                                         | 20.3 | 10                                                   | 7.8  |          |
| Age 13 through 18 years              | 18                                         | 14.1 | 15                                                   | 11.7 |          |
| Unknown age                          | 3                                          | 2.3  | 2                                                    | 1.6  |          |
| Perpetrator of abuse‡                |                                            |      |                                                      |      |          |
| Mother or stepmother                 | 14                                         | 10.9 | 11                                                   | 8.6  | 0.53     |
| Father or stepfather                 | 36                                         | 28.1 | 12                                                   | 9.4  | <0.001   |
| Boyfriend or spouse                  | 12                                         | 9.4  | 12                                                   | 9.4  | 1.00     |
| Other or unknown                     | 0                                          | 0.0  | 3                                                    | 2.3  | 0.25     |
| <b>Q2: physical abuse</b>            | 25                                         | 19.5 | 6                                                    | 4.7  | <0.001   |
| Multiple instances of abuse          | 24                                         | 18.8 | 6                                                    | 4.7  | <0.001   |
| Earliest age of onset†               |                                            |      |                                                      |      | 0.002    |
| No experience                        | 103                                        | 80.5 | 122                                                  | 95.3 |          |
| Birth through age 12 years           | 12                                         | 9.4  | 2                                                    | 1.6  |          |
| Age 13 through 18 years              | 11                                         | 8.6  | 4                                                    | 3.1  |          |
| Unknown age                          | 2                                          | 1.6  | 0                                                    | 0.0  |          |
| Perpetrator of abuse‡                |                                            |      |                                                      |      |          |
| Mother or stepmother                 | 5                                          | 3.9  | 1                                                    | 0.8  | 0.21     |
| Father or stepfather                 | 15                                         | 11.7 | 3                                                    | 2.3  | 0.006    |
| Boyfriend or spouse                  | 10                                         | 7.8  | 2                                                    | 1.6  | 0.03     |
| Other or unknown                     | 1                                          | 0.8  | 1                                                    | 0.8  | 1.00     |
| <b>Q3: sexual abuse</b>              | 10                                         | 7.8  | 6                                                    | 4.7  | 0.30     |
| Multiple instances of abuse          | 5                                          | 3.9  | 4                                                    | 3.1  | 1.00     |
| Earliest age of onset†               |                                            |      |                                                      |      | 0.55     |
| No experience                        | 118                                        | 92.2 | 122                                                  | 95.3 |          |
| Birth through age 12 years           | 4                                          | 3.1  | 3                                                    | 2.3  |          |
| Age 13 through 18 years              | 4                                          | 3.1  | 3                                                    | 2.3  |          |
| Unknown age                          | 2                                          | 1.6  | 0                                                    | 0.0  |          |

**Supplementary table 2.** Characteristics of cases and controls for each adverse childhood experience (continued 1)

| Characteristic of adverse experience   | Bilateral oophorectomy<br>(cases; N = 128) |      | Women without<br>oophorectomy<br>(controls; N = 128) |      | p Value* |
|----------------------------------------|--------------------------------------------|------|------------------------------------------------------|------|----------|
|                                        | N                                          | %    | N                                                    | %    |          |
| Perpetrator of abuse†                  |                                            |      |                                                      |      |          |
| Mother or stepmother                   | 0                                          | 0.0  | 0                                                    | 0.0  | --       |
| Father or stepfather                   | 1                                          | 0.8  | 0                                                    | 0.0  | 1.00     |
| Boyfriend or spouse                    | 3                                          | 2.3  | 2                                                    | 1.6  | 1.00     |
| Other or unknown                       | 7                                          | 5.5  | 5                                                    | 3.9  | 0.55     |
| <b>Q4: emotional neglect</b>           | 23                                         | 18.0 | 19                                                   | 14.8 | 0.50     |
| Earliest age of onset†                 |                                            |      |                                                      |      | 0.66     |
| No experience                          | 105                                        | 82.0 | 109                                                  | 85.2 |          |
| Birth through age 12 years             | 14                                         | 10.9 | 9                                                    | 7.0  |          |
| Age 13 through 18 years                | 5                                          | 3.9  | 4                                                    | 3.1  |          |
| Unknown age                            | 4                                          | 3.1  | 6                                                    | 4.7  |          |
| <b>Q5: physical neglect</b>            | 6                                          | 4.7  | 11                                                   | 8.6  | 0.21     |
| Earliest age of onset†                 |                                            |      |                                                      |      | 0.48     |
| No experience                          | 122                                        | 95.3 | 117                                                  | 91.4 |          |
| Birth through age 12 years             | 4                                          | 3.1  | 6                                                    | 4.7  |          |
| Age 13 through 18 years                | 0                                          | 0.0  | 0                                                    | 0.0  |          |
| Unknown age                            | 2                                          | 1.6  | 5                                                    | 3.9  |          |
| <b>Q6: parental separation</b>         | 22                                         | 17.2 | 16                                                   | 12.5 | 0.29     |
| Earliest age of onset†                 |                                            |      |                                                      |      | 0.66     |
| No experience                          | 106                                        | 82.8 | 112                                                  | 87.5 |          |
| Birth through age 12 years             | 12                                         | 9.4  | 10                                                   | 7.8  |          |
| Age 13 through 18 years                | 8                                          | 6.3  | 5                                                    | 3.9  |          |
| Unknown age                            | 2                                          | 1.6  | 1                                                    | 0.8  |          |
| Type of separation                     |                                            |      |                                                      |      | 0.44     |
| No separation                          | 106                                        | 82.8 | 112                                                  | 87.5 |          |
| Death of parent                        | 8                                          | 6.3  | 4                                                    | 3.1  |          |
| Separation or divorce                  | 14                                         | 10.9 | 12                                                   | 9.4  |          |
| <b>Q7: witnessed domestic violence</b> | 7                                          | 5.5  | 4                                                    | 3.1  | 0.36     |
| Earliest age of onset†                 |                                            |      |                                                      |      | 0.39     |
| No experience                          | 121                                        | 94.5 | 124                                                  | 96.9 |          |
| Birth through age 12 years             | 6                                          | 4.7  | 2                                                    | 1.6  |          |
| Age 13 through 18 years                | 0                                          | 0.0  | 1                                                    | 0.8  |          |
| Unknown age                            | 1                                          | 0.8  | 1                                                    | 0.8  |          |

**Supplementary table 2.** Characteristics of cases and controls for each adverse childhood experience (continued 2)

| Characteristic of adverse experience     | Bilateral oophorectomy<br>(cases; N = 128) |      | Women without<br>oophorectomy<br>(controls; N = 128) |      | p Value* |
|------------------------------------------|--------------------------------------------|------|------------------------------------------------------|------|----------|
|                                          | N                                          | %    | N                                                    | %    |          |
| <b>Q8: substance abuse in household§</b> | 61                                         | 47.7 | 44                                                   | 34.4 | 0.03     |
| Earliest age of onset†                   |                                            |      |                                                      |      | 0.003    |
| No experience                            | 67                                         | 52.3 | 84                                                   | 65.6 |          |
| Birth through age 12 years               | 54                                         | 42.2 | 30                                                   | 23.4 |          |
| Age 13 through 18 years                  | 4                                          | 3.1  | 3                                                    | 2.3  |          |
| Unknown age                              | 3                                          | 2.3  | 11                                                   | 8.6  |          |
| Person who abused substances‡            |                                            |      |                                                      |      |          |
| Mother or stepmother                     | 12                                         | 9.4  | 12                                                   | 9.4  | 1.00     |
| Father or stepfather                     | 40                                         | 31.3 | 33                                                   | 25.8 | 0.33     |
| Other or unknown                         | 27                                         | 21.1 | 18                                                   | 14.1 | 0.14     |
| Alcohol abuse                            | 60                                         | 46.9 | 44                                                   | 34.4 | 0.04     |
| Person who abused alcohol‡               |                                            |      |                                                      |      |          |
| Mother or stepmother                     | 12                                         | 9.4  | 12                                                   | 9.4  | 1.00     |
| Father or stepfather                     | 39                                         | 30.5 | 33                                                   | 25.8 | 0.40     |
| Other or unknown                         | 26                                         | 20.3 | 18                                                   | 14.1 | 0.19     |
| Drug abuse¶                              | 12                                         | 9.4  | 4                                                    | 3.1  | 0.04     |
| Person who abused drugs‡                 |                                            |      |                                                      |      |          |
| Mother or stepmother                     | 4                                          | 3.1  | 2                                                    | 1.6  | 0.68     |
| Father or stepfather                     | 4                                          | 3.1  | 2                                                    | 1.6  | 0.68     |
| Other or unknown                         | 6                                          | 4.7  | 1                                                    | 0.8  | 0.12     |
| <b>Q9: mental illness in household</b>   | 46                                         | 35.9 | 39                                                   | 30.5 | 0.35     |
| Earliest age of onset†                   |                                            |      |                                                      |      | 0.23     |
| No experience                            | 82                                         | 64.1 | 89                                                   | 69.5 |          |
| Birth through age 12 years               | 37                                         | 28.9 | 25                                                   | 19.5 |          |
| Age 13 through 18 years                  | 4                                          | 3.1  | 4                                                    | 3.1  |          |
| Unknown age                              | 5                                          | 3.9  | 10                                                   | 7.8  |          |
| Suicidal ideation or attempt**           | 4                                          | 3.1  | 3                                                    | 2.3  | 1.00     |
| Type of mental illness‡                  |                                            |      |                                                      |      |          |
| Depression                               | 43                                         | 33.6 | 35                                                   | 27.3 | 0.28     |
| Anxiety                                  | 8                                          | 6.3  | 2                                                    | 1.6  | 0.053    |
| Other mental illness or unknown††        | 6                                          | 4.7  | 4                                                    | 3.1  | 0.52     |

**Supplementary table 2.** Characteristics of cases and controls for each adverse childhood experience (continued 3)

| Characteristic of adverse experience | Bilateral oophorectomy<br>(cases; N = 128) |      | Women without<br>oophorectomy<br>(controls; N = 128) |      | p Value* |
|--------------------------------------|--------------------------------------------|------|------------------------------------------------------|------|----------|
|                                      | N                                          | %    | N                                                    | %    |          |
| Person who was mentally ill†‡        |                                            |      |                                                      |      |          |
| Mother or stepmother                 | 25                                         | 19.5 | 20                                                   | 15.6 | 0.41     |
| Father or stepfather                 | 15                                         | 11.7 | 14                                                   | 10.9 | 0.84     |
| Other or unknown                     | 16                                         | 12.5 | 11                                                   | 8.6  | 0.31     |
| <b>Q10: incarceration</b>            | 1                                          | 0.8  | 0                                                    | 0.0  | 1.00     |

\* The p values were calculated using chi-squared tests or Fisher's exact tests.

† The earliest age at onset was recorded for each experience separately. Women who reported the experience as occurring during infancy, toddler years, grade school or elementary school years, or simply as occurring during "childhood" without providing a specific age were included in the birth through age 12 years category. Women who reported the experience as occurring during middle school, junior high or high school years, or simply as occurring during "teen years" without providing a specific age were included in the age 13 through 18 years category.

‡ All applicable categories were selected, so each woman may fall in more than one category.

§ Substance abuse included alcohol abuse, illegal drug abuse, or prescription drug abuse.

¶ The type of drug(s) abused were either not specified in the medical record, or only referred to as "street drugs". No specific drug type was identified for the 16 women with drug abuse in their household.

\*\* Although 7 women experienced a household member with suicidal ideation, no household members actually committed suicide before the woman's 19th birth date.

†† Includes bipolar disorder, schizophrenia, psychosis, and other mental illnesses.

**Supplementary table 3.** Sensitivity analyses for adverse childhood experiences or abuse in adulthood excluding matched pairs in which the control had bilateral oophorectomy after index date

| Adverse experience                                    | Bilateral oophorectomy (cases; N = 119) |      | Women without oophorectomy (controls; N = 119) |      | Case-control analyses* |         |
|-------------------------------------------------------|-----------------------------------------|------|------------------------------------------------|------|------------------------|---------|
|                                                       | N                                       | %    | N                                              | %    | OR (95% CI)            | p Value |
| <b>Childhood (age &lt;19 years)</b>                   |                                         |      |                                                |      |                        |         |
| Q1: verbal or emotional abuse                         | 44                                      | 37.0 | 22                                             | 18.5 | 2.37 (1.32, 4.26)      | 0.004   |
| Q2: physical abuse                                    | 24                                      | 20.2 | 4                                              | 3.4  | 11.00 (2.59, 46.78)    | 0.001   |
| Q3: sexual abuse                                      | 10                                      | 8.4  | 5                                              | 4.2  | 2.00 (0.68, 5.85)      | 0.21    |
| Q4: emotional neglect                                 | 21                                      | 17.6 | 14                                             | 11.8 | 1.54 (0.77, 3.09)      | 0.23    |
| Q5: physical neglect                                  | 6                                       | 5.0  | 8                                              | 6.7  | 0.60 (0.14, 2.51)      | 0.48    |
| Q6: parental separation                               | 21                                      | 17.6 | 15                                             | 12.6 | 1.55 (0.72, 3.30)      | 0.26    |
| Q7: witnessed domestic violence                       | 7                                       | 5.9  | 4                                              | 3.4  | 1.75 (0.51, 5.98)      | 0.37    |
| Q8: substance abuse in household                      | 56                                      | 47.1 | 39                                             | 32.8 | 2.00 (1.12, 3.58)      | 0.02    |
| Q9: mental illness in household                       | 40                                      | 33.6 | 34                                             | 28.6 | 1.32 (0.72, 2.39)      | 0.37    |
| Q10: incarceration                                    | 1                                       | 0.8  | 0                                              | 0.0  | --                     | --      |
| Any abuse (verbal or emotional, physical, sexual)     | 48                                      | 40.3 | 24                                             | 20.2 | 2.41 (1.37, 4.25)      | 0.002   |
| ACE score $\geq 1$                                    | 93                                      | 78.2 | 64                                             | 53.8 | 3.42 (1.80, 6.50)      | <0.001  |
| ACE score $\geq 2$                                    | 61                                      | 51.3 | 45                                             | 37.8 | 1.94 (1.08, 3.48)      | 0.03    |
| ACE score $\geq 3$                                    | 36                                      | 30.3 | 21                                             | 17.6 | 2.00 (1.08, 3.72)      | 0.03    |
| ACE score $\geq 4$                                    | 21                                      | 17.6 | 10                                             | 8.4  | 2.37 (1.04, 5.43)      | 0.04    |
| ACE score                                             |                                         |      |                                                |      |                        |         |
| 0                                                     | 26                                      | 21.9 | 55                                             | 46.2 | (reference)            |         |
| 1                                                     | 32                                      | 26.9 | 19                                             | 16.0 | 4.05 (1.76, 9.30)      | 0.001   |
| 2                                                     | 25                                      | 21.0 | 24                                             | 20.2 | 2.60 (1.18, 5.71)      | 0.02    |
| 3                                                     | 15                                      | 12.6 | 11                                             | 9.2  | 3.09 (1.21, 7.92)      | 0.02    |
| $\geq 4$                                              | 21                                      | 17.7 | 10                                             | 8.4  | 5.95 (2.16, 16.41)     | <0.001  |
| <b>Adulthood (age 19 to index date)</b>               |                                         |      |                                                |      |                        |         |
| Verbal or emotional abuse                             | 38                                      | 31.9 | 40                                             | 33.6 | 0.93 (0.55, 1.57)      | 0.79    |
| Physical abuse                                        | 25                                      | 21.0 | 16                                             | 13.4 | 1.69 (0.85, 3.36)      | 0.13    |
| Sexual abuse                                          | 7                                       | 5.9  | 1                                              | 0.8  | 7.00 (0.86, 56.89)     | 0.07    |
| Any abuse (verbal or emotional, physical, sexual)     | 43                                      | 36.1 | 41                                             | 34.5 | 1.07 (0.64, 1.79)      | 0.79    |
| <b>Cumulative experience from birth to index date</b> |                                         |      |                                                |      |                        |         |
| Verbal or emotional abuse                             | 59                                      | 49.6 | 46                                             | 38.7 | 1.54 (0.92, 2.58)      | 0.10    |
| Physical abuse                                        | 34                                      | 28.6 | 19                                             | 16.0 | 2.15 (1.12, 4.16)      | 0.02    |
| Sexual abuse                                          | 14                                      | 11.8 | 5                                              | 4.2  | 2.80 (1.01, 7.77)      | 0.048   |
| Any abuse (verbal or emotional, physical, sexual)     | 63                                      | 52.9 | 47                                             | 39.5 | 1.67 (1.00, 2.76)      | 0.048   |

\* The ORs, CIs, and p values were calculated using conditional logistic regression models (matched pairs).

ACE, Adverse Childhood Experiences.

**Supplementary table 4.** Sensitivity analyses for adverse childhood experiences or abuse in adulthood for women who had medical records dating back to birth year

| Adverse experience                                    | Bilateral oophorectomy (cases; N = 85) |      | Women without oophorectomy (controls; N = 74) |      | Case-control analyses* |         |
|-------------------------------------------------------|----------------------------------------|------|-----------------------------------------------|------|------------------------|---------|
|                                                       | N                                      | %    | N                                             | %    | OR (95% CI)            | p Value |
| <b>Childhood (age &lt;19 years)</b>                   |                                        |      |                                               |      |                        |         |
| Q1: verbal or emotional abuse                         | 32                                     | 37.6 | 18                                            | 24.3 | 1.88 (0.94, 3.74)      | 0.07    |
| Q2: physical abuse                                    | 16                                     | 18.8 | 5                                             | 6.8  | 3.20 (1.11, 9.22)      | 0.03    |
| Q3: sexual abuse                                      | 6                                      | 7.1  | 3                                             | 4.1  | 1.80 (0.43, 7.45)      | 0.42    |
| Q4: emotional neglect                                 | 15                                     | 17.6 | 10                                            | 13.5 | 1.37 (0.58, 3.27)      | 0.48    |
| Q5: physical neglect                                  | 5                                      | 5.9  | 6                                             | 8.1  | 0.71 (0.21, 2.42)      | 0.58    |
| Q6: parental separation                               | 14                                     | 16.5 | 9                                             | 12.2 | 1.42 (0.58, 3.51)      | 0.44    |
| Q7: witnessed domestic violence                       | 5                                      | 5.9  | 2                                             | 2.7  | 2.25 (0.42, 11.95)     | 0.34    |
| Q8: substance abuse in household                      | 39                                     | 45.9 | 28                                            | 37.8 | 1.39 (0.74, 2.63)      | 0.31    |
| Q9: mental illness in household                       | 32                                     | 37.6 | 24                                            | 32.4 | 1.26 (0.65, 2.42)      | 0.49    |
| Q10: incarceration                                    | 0                                      | 0.0  | 0                                             | 0.0  | --                     | --      |
| Any abuse (verbal or emotional, physical, sexual)     | 36                                     | 42.4 | 19                                            | 25.7 | 2.13 (1.08, 4.18)      | 0.03    |
| ACE score $\geq 1$                                    | 65                                     | 76.5 | 42                                            | 56.8 | 2.48 (1.25, 4.89)      | 0.009   |
| ACE score $\geq 2$                                    | 45                                     | 52.9 | 34                                            | 45.9 | 1.32 (0.71, 2.47)      | 0.38    |
| ACE score $\geq 3$                                    | 26                                     | 30.6 | 17                                            | 23.0 | 1.48 (0.73, 3.01)      | 0.28    |
| ACE score $\geq 4$                                    | 15                                     | 17.6 | 9                                             | 12.2 | 1.55 (0.63, 3.78)      | 0.34    |
| ACE score                                             |                                        |      |                                               |      |                        |         |
| 0                                                     | 20                                     | 23.5 | 32                                            | 43.2 | (reference)            |         |
| 1                                                     | 20                                     | 23.5 | 8                                             | 10.8 | 4.00 (1.48, 10.79)     | 0.006   |
| 2                                                     | 19                                     | 22.4 | 17                                            | 23.0 | 1.79 (0.76, 4.23)      | 0.19    |
| 3                                                     | 11                                     | 12.9 | 8                                             | 10.8 | 2.20 (0.76, 6.40)      | 0.15    |
| $\geq 4$                                              | 15                                     | 17.7 | 9                                             | 12.2 | 2.67 (0.98, 7.23)      | 0.054   |
| <b>Adulthood (age 19 to index date)</b>               |                                        |      |                                               |      |                        |         |
| Verbal or emotional abuse                             | 25                                     | 29.4 | 20                                            | 27.0 | 1.12 (0.56, 2.25)      | 0.74    |
| Physical abuse                                        | 17                                     | 20.0 | 8                                             | 10.8 | 2.06 (0.83, 5.10)      | 0.12    |
| Sexual abuse                                          | 4                                      | 4.7  | 0                                             | 0.0  | --                     | --      |
| Any abuse (verbal or emotional, physical, sexual)     | 30                                     | 35.3 | 20                                            | 27.0 | 1.47 (0.75, 2.90)      | 0.26    |
| <b>Cumulative experience from birth to index date</b> |                                        |      |                                               |      |                        |         |
| Verbal or emotional abuse                             | 41                                     | 48.2 | 25                                            | 33.8 | 1.83 (0.96, 3.47)      | 0.07    |
| Physical abuse                                        | 23                                     | 27.1 | 10                                            | 13.5 | 2.37 (1.04, 5.39)      | 0.04    |
| Sexual abuse                                          | 9                                      | 10.6 | 3                                             | 4.1  | 2.80 (0.73, 10.77)     | 0.13    |
| Any abuse (verbal or emotional, physical, sexual)     | 45                                     | 52.9 | 25                                            | 33.8 | 2.20 (1.16, 4.19)      | 0.02    |

\* The ORs, CIs, and p values were calculated using conditional logistic regression models (matched pairs).

ACE, Adverse Childhood Experiences.
